# Supplementary material for: Risk of Psychiatric Disorders Among Spouses of Patients With Cancer in Denmark and Sweden
Source: PubMed Central journal article supplement (PMC9857700; doi:10.1001/jamanetworkopen.2022.49560), 2023-01-05
Supplement: jamanetwopen-e2249560-s001.pdf [file jamanetwopen-e2249560-s001.pdf]

## Supplemental Online Content

Hu K, Liu Q, László KD, et al. Risk of psychiatric disorders among spouses of patients with cancer in Denmark and Sweden. *JAMA Netw Open*. 2023;6(1):e2249560.  
doi:10.1001/jamanetworkopen.2022.49560

**eMethods.** Proportional Hazard (PH) Assumption of Cox Models

**eTable 1.** *International Classification of Diseases (ICD)* Codes for Cancer Subtypes in the Danish and Swedish Cancer Registers

**eTable 2.** The Danish and Swedish Revisions of *International Classification of Diseases (ICD)* Codes for Psychiatric Disorders

**eTable 3.** Baseline Characteristics of the Study Participants by Country

**eTable 4.** Hazard Ratios (HRs) and 95% CIs of Any First-Onset Disorder in Relation to Being Spouse of a Patient With Cancer, Subgroup Analysis by Characteristics of the Patient

**eTable 5.** Hazard Ratios (HRs) and 95% CIs of Any First-Onset Psychiatric Disorder in Relation to Being Spouse of a Patient With Cancer, With Further Adjustment for Highest Attained Education, Smoking Status, Body Mass Index, or Charlson Comorbidity Index

**eTable 6.** Hazard Ratios (HRs) and 95% CIs of Any First-Onset Psychiatric Disorder in Relation to Being a Spouse of a Patient With Cancer, Stratified Analysis by Family Status

**eTable 7.** Hazard Ratios (HRs) and 95% CIs of Any First-Onset Psychiatric Disorder in Relation to Being a Spouse of a Patient With Cancer, Stratified by Sex and Marital Status

**eFigure.** Flow Chart of the Study Design

This supplemental material has been provided by the authors to give readers additional information about their work.

**eMethods. Proportional Hazard (PH) Assumption of Cox Models**

For all Cox proportional hazards models, we plotted the Schoenfeld residuals against time for the exposure variables and found the residuals to largely scatter around zero. No major deviation from the proportional hazard assumption was therefore detected for any of the exposure variables. As exposure variables are our primary interest and violations of the assumption for these variables are arguably more severe and likely to cause more bias, than violations of the assumption for covariates, it is a reasonable pragmatic compromise to only test the proportionality assumption for the exposure variables.

**eTable 1. *International Classification of Diseases (ICD) Codes for Cancer Subtypes in the Danish and Swedish Cancer Registers***

| <b>Cancer site/type</b>                  | <b>ICD-7</b>          | <b>ICD-10</b>         |
|------------------------------------------|-----------------------|-----------------------|
| <b>Any cancer</b>                        | 140-207               | C00-C97               |
| <b>Bladder</b>                           | 181                   | C67                   |
| <b>Breast</b>                            | 170                   | C50                   |
| <b>Central nervous system</b>            | 193                   | C70-C72               |
| <b>Cervix uteri</b>                      | 171                   | C53                   |
| <b>Colon</b>                             | 153                   | C18                   |
| <b>Corpus uteri</b>                      | 172                   | C54                   |
| <b>Esophagus</b>                         | 150                   | C15                   |
| <b>Hematological malignancy</b>          | 200-207               | C81-C96               |
| <b>Kidney</b>                            | 180                   | C64-C66               |
| <b>Liver and biliary passages</b>        | 155                   | C22-C24               |
| <b>Lung (incl. trachea and bronchus)</b> | 162-163               | C33-C34               |
| <b>Melanoma</b>                          | 190                   | C43                   |
| <b>Non-melanoma skin</b>                 | 191                   | C44                   |
| <b>Ovary</b>                             | 175                   | C56                   |
| <b>Pancreas</b>                          | 157                   | C25                   |
| <b>Prostate</b>                          | 177                   | C61                   |
| <b>Rectum</b>                            | 154                   | C20                   |
| <b>Stomach</b>                           | 151                   | C16                   |
| <b>Thyroid and other endocrine gland</b> | 194-195               | C73-C75               |
| <b>Upper aerodigestive tract</b>         | 140-141, 143-148, 161 | C00-C07, C09-C14, C32 |

To identify the cancer patients, ICD-7 (1943–1977) and ICD-10 (1978-) were used in Danish Cancer Register and ICD-7 (1958-) was used in Swedish Cancer Register.

**eTable 2. The Danish and Swedish Revisions of *International Classification of Diseases (ICD) Codes for Psychiatric Disorders***

| <b>Diseases</b>                 | <b>Denmark</b>                                               | <b>Sweden</b>                                                                               |
|---------------------------------|--------------------------------------------------------------|---------------------------------------------------------------------------------------------|
| <b>Any psychiatric disorder</b> | ICD-8: 291, 295-315<br>ICD-10: F10-F99                       | ICD-8: 291, 295-315<br>ICD-9: 291, 292, 295-319<br>ICD-10: F10-F99                          |
| <b>Substance abuse</b>          | ICD-8: 291, 303, 304<br>ICD-10: F10-F19                      | ICD-8: 291, 303, 304<br>ICD-9: 291, 292, 303-305<br>ICD-10: F10-F19                         |
| <b>Depression</b>               | ICD-8: 29609, 29629, 29699, 29809, 30049<br>ICD-10: F32, F33 | ICD-8: 296.0, 296.2, 298.0, 300.4<br>ICD-9: 296B, 296D, 298A, 300E, 311<br>ICD-10: F32, F33 |
| <b>Anxiety</b>                  | ICD-8: 3000, 3002<br>ICD-10: F40, F41                        | ICD-8: 300.0, 300.2<br>ICD-9: 300A, 300C<br>ICD-10: F40, F41                                |
| <b>Stress-related disorders</b> | ICD-8: 307<br>ICD-10: F43                                    | ICD-8: 307<br>ICD-9: 308-309<br>ICD-10: F43                                                 |

ICD codes were used to identify psychiatric disorders in the Danish Patient Register, Civil Registration System, and Psychiatric Central Register, as well as in the Swedish Patient and Causes of Death Register. ICD-8 was implemented in Denmark during 1977-1993 and replaced by ICD-10 since 1994. For Swedish revisions of ICD codes, ICD-8 was used during 1968-1986, replaced by ICD-9 during 1987-1996 and replaced by ICD-10 since 1997.

**eTable 3. Baseline Characteristics of the Study Participants by Country**

| Characteristics                                 | Denmark                              |                                                  | Sweden                               |                                                  |
|-------------------------------------------------|--------------------------------------|--------------------------------------------------|--------------------------------------|--------------------------------------------------|
|                                                 | Spouses of cancer patients (exposed) | Spouses of cancer-free individuals (unexposed) a | Spouses of cancer patients (exposed) | Spouses of cancer-free individuals (unexposed) a |
| <b>Total number</b>                             | 384,553                              | 1,922,757                                        | 161,768                              | 808,817                                          |
|                                                 | <b>Participants, No. (%)</b>         | <b>Participants, No. (%)</b>                     | <b>Participants, No. (%)</b>         | <b>Participants, No. (%)</b>                     |
| <b>Sex</b>                                      |                                      |                                                  |                                      |                                                  |
| Male                                            | 172,662 (44.9)                       | 863,302 (44.9)                                   | 78,800 (48.7)                        | 393,985 (48.7)                                   |
| Female                                          | 211,891 (55.1)                       | 1,059,455 (55.1)                                 | 82,968 (51.3)                        | 414,832 (51.3)                                   |
| <b>Age at cohort entry, Median [IQR], years</b> | 63 [54-70]                           | 63 [54-70]                                       | 54 [45-61]                           | 54 [45-61]                                       |
| <b>Age at cohort entry, years</b>               |                                      |                                                  |                                      |                                                  |
| 18-39                                           | 16,662 (4.3)                         | 83,445 (4.3)                                     | 23,874 (14.8)                        | 119,370 (14.8)                                   |
| 40-59                                           | 131,491 (34.2)                       | 657,813 (34.2)                                   | 87,824 (54.3)                        | 439,120 (54.3)                                   |
| 60-79                                           | 215,603 (56.1)                       | 1,077,481 (56.0)                                 | 49,749 (30.8)                        | 248,734 (30.1)                                   |
| 80-104                                          | 20,797 (5.4)                         | 104,018 (5.4)                                    | 321 (0.2)                            | 1,593 (0.2)                                      |
| <b>Calendar year of cohort entry</b>            |                                      |                                                  |                                      |                                                  |
| 1973-1989                                       | 29,945 (7.8)                         | 149,725 (7.8)                                    | 13,103 (8.1)                         | 65,512 (8.1)                                     |
| 1990-1999                                       | 98,732 (25.7)                        | 493,660 (25.7)                                   | 27,651 (17.1)                        | 138,254 (17.1)                                   |
| 2000-2009                                       | 147,770 (38.4)                       | 738,842 (38.4)                                   | 65,657 (40.6)                        | 328,271 (40.6)                                   |
| 2010-2016                                       | 108,106 (28.1)                       | 540,530 (28.1)                                   | 55,357 (34.2)                        | 276,780 (34.2)                                   |
| <b>Country of residence</b>                     |                                      |                                                  |                                      |                                                  |
| Denmark                                         | 192,992 (50.2)                       | 1,052,899 (54.8)                                 | 26,668 (16.5)                        | 124,752 (15.4)                                   |
| Sweden                                          | 52,211 (13.6)                        | 242,485 (12.6)                                   | 57,993 (35.9)                        | 285,718 (35.3)                                   |
| <b>Household income<sup>b</sup></b>             | 139,020 (36.2)                       | 623,021 (32.4)                                   | 75,759 (46.8)                        | 391,420 (48.4)                                   |
| Below the lowest tertile                        | 330 (0.1)                            | 4,352 (0.2)                                      | 1,348 (0.8)                          | 6,927 (0.9)                                      |
| Between the lowest and middle tertile           |                                      |                                                  |                                      |                                                  |
| Above the highest tertile                       | 39,497 (10.3)                        | 168,329 (8.8)                                    | 8,167 (5.0)                          | 40,004 (4.9)                                     |
| Unknown                                         | 345,056 (89.7)                       | 1,754,428 (91.3)                                 | 153,601 (95.0)                       | 768,813 (95.1)                                   |
| <b>History of cancer</b>                        |                                      |                                                  |                                      |                                                  |
| Yes                                             | 140,551 (36.6)                       | 717,166 (37.3)                                   | 31,929 (19.7)                        | 160,066 (19.8)                                   |
| No                                              | 156,315 (40.7)                       | 763,571 (39.7)                                   | 87,997 (54.4)                        | 440,275 (54.4)                                   |
| <b>Years of education</b>                       | 63,295 (16.5)                        | 308,634 (16.1)                                   | 26,481 (16.4)                        | 131,622 (16.3)                                   |
| 0-9                                             | 24,392 (6.3)                         | 133,386 (6.9)                                    | 1,561 (9.5)                          | 76,854 (9.5)                                     |

IQR, interquartile range.

a Individually matched by sex, year of birth, and country of residence. Date of cohort entry was the date of cancer diagnosis for the exposed spouses.

b Household income were classified into three groups according to the tertile distribution of each 10-year intervals in each country.

**eTable 4. Hazard Ratios (HRs) and 95% CIs of Any First-Onset Disorder in Relation to Being Spouse of a Patient With Cancer, Subgroup Analysis by Characteristics of the Patient**

| <b>Characteristics of the cancer patient</b> | <b>HR (95% CI) <sup>a</sup></b> |
|----------------------------------------------|---------------------------------|
| <b>Age at diagnosis, years</b>               |                                 |
| 18-39                                        | 1.04 (1.00-1.07)                |
| 40-59                                        | 1.18 (1.16-1.20)                |
| 60-79                                        | 1.14 (1.13-1.17)                |
| 80-104                                       | 1.06 (1.11-1.11)                |
| <b>Cancer stage <sup>b</sup></b>             |                                 |
| Localized                                    | 0.98 (0.95-1.01)                |
| Regional spread or advanced                  | 1.31 (1.26-1.36)                |
| Unknown                                      | 1.16 (1.14-1.17)                |

<sup>a</sup> Estimated from Cox models, adjusting for sex, age at cohort entry, calendar year at cohort entry, country of residence, household income, and history of cancer.

<sup>b</sup> Analysis restricted to Danish participants with a spouse diagnosed with cancer from 2004 onward and their individually matched unexposed spouses. TNM information was used to classify cancer stage into localized (any T/N0/M0), regional spread or advanced (any T/N+/M0 or any T/any N/M+), and unknown stage according to the European Network of Cancer Registries Condensed TNM Scheme. Cancers with missing or unknown TNM stage and cancer of the central nervous system were classified as “Unknown”. Haematological malignancies were excluded from the analysis.

**eTable 5. Hazard Ratios (HRs) and 95% CIs of Any First-Onset Psychiatric Disorder in Relation to Being Spouse of a Patient With Cancer, With Further Adjustment for Highest Attained Education, Smoking Status, Body Mass Index, or Charlson Comorbidity Index**

| <b>Additional adjustment</b>            | <b>HR (95% CI)</b> |
|-----------------------------------------|--------------------|
| Highest attained education <sup>a</sup> | 1.15 (1.14-1.17)   |
| Smoking status <sup>b</sup>             | 1.11 (1.07-1.16)   |
| Body mass index <sup>c</sup>            | 1.15 (1.10-1.21)   |
| Charlson Comorbidity Index <sup>d</sup> | 1.16 (1.14-1.17)   |

<sup>a</sup> HRs and 95% CIs were estimated from Cox models, adjusting for sex, age at cohort entry, calendar year at cohort entry, country of residence, household income, history of cancer, and highest attained education (alternatively smoking status, body mass index or Charlson Comorbidity Index).

<sup>b</sup> Smoking status during the first pregnancy was retrieved from the Danish and Swedish Medical Birth Register (only available for pregnant women) and available since 1991 in Denmark and 1982 in Sweden.

<sup>c</sup> Body mass index (BMI) during the first pregnancy was retrieved from the Danish and Swedish Medical Birth Register (only available for pregnant women) and available since 2004 in Denmark and during 1982-1989 and since 1992 in Sweden.

<sup>d</sup> limited to Danish participants.

**eTable 6. Hazard Ratios (HRs) and 95% CIs of Any First-Onset Psychiatric Disorder in Relation to Being a Spouse of a Patient With Cancer, Stratified Analysis by Family Status**

| <b>Family status</b>                           | <b>HR (95% CI) <sup>a</sup></b> |
|------------------------------------------------|---------------------------------|
| <b>Marital status <sup>b</sup></b>             |                                 |
| No change                                      | 1.05 (1.03-1.07)                |
| Divorced                                       | 1.03 (1.01-1.05)                |
| Widowed                                        | 1.29 (1.27-1.31)                |
| <b>Sharing a biological child <sup>c</sup></b> |                                 |
| Yes                                            | 1.20 (1.19-1.22)                |
| No                                             | 1.15 (1.11-1.20)                |

<sup>a</sup> Estimated from Cox models, adjusting for sex, age at cohort entry, calendar year at cohort entry, country of residence, household income, and history of cancer.

<sup>b</sup> Marital status was treated as time-varying variable, considering information at the time of cohort entry as well as during follow-up. Follow-up was split at the change of marital status (e.g., divorce or death of the cancer patient).

<sup>c</sup> Limited to Danish participants and treated as a fixed variable, considering information at the time of cohort entry. There were in total 1,861,180 spouses with at least one child and 446,130 spouses without. The incidence rate per 1000 person-years was 6.0 among spouses who had had a child and 8.4 among spouses who had not.



**eTable 7. Hazard Ratios (HRs) and 95% CIs of Any First-Onset Psychiatric Disorder in Relation to Being a Spouse of a Patient With Cancer, Stratified by Sex and Marital Status**

|                                    | <b>Males</b>                    | <b>Females</b>                  |
|------------------------------------|---------------------------------|---------------------------------|
|                                    | <b>HR (95% CI) <sup>a</sup></b> | <b>HR (95% CI) <sup>a</sup></b> |
| <b>Marital status <sup>b</sup></b> |                                 |                                 |
| No changes                         | 1.06 (1.04-1.08)                | 1.04 (1.02-1.06)                |
| Divorced                           | 1.04 (1.02-1.07)                | 1.03 (1.00-1.05)                |
| Widowed                            | 1.48 (1.44-1.52)                | 1.18 (1.16-1.21)                |

<sup>a</sup> Estimated from Cox models, adjusting for sex, age at cohort entry, calendar year at cohort entry, country of residence, household income, and history of cancer.

<sup>b</sup> Marital status was treated as time-varying variable, considering information at the time of cohort entry as well as during follow-up. Follow-up was split at the change of marital status (e.g., divorce or death of the cancer patient).

## eFigure. Flow Chart of the Study Design

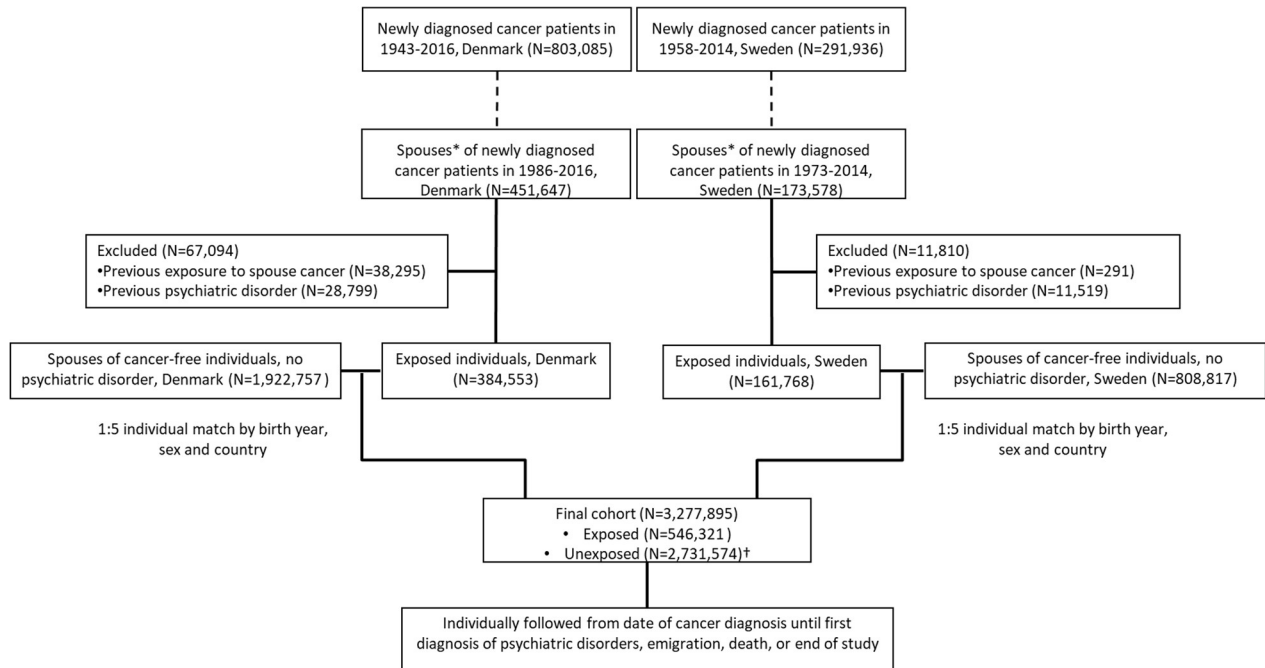

This study was designed within the Danish-Swedish joint project of stressful life events, which includes general Danish population born during 1878-2016, and Swedish population born during 1973-2014 together with their parents.

\*The spouses were defined using spousal link for the Danish population, and shared biological child and marital status for Swedish population.

† The number of unexposed spouses is not equal to 5 times the number of exposed spouses due to a limited number of eligible spouses born in earlier years (<1932).
