# Supplementary material for: Risk of Psychiatric Disorders Among Spouses of Patients With Cancer in Denmark and Sweden
Source: PubMed Central journal article supplement (PMC9857700; doi:10.1001/jamanetworkopen.2022.49560), 2023-01-05
Supplement: jamanetwopen-e2249560-s002.pdf [file jamanetwopen-e2249560-s002.pdf]

## Data Sharing Statement

Hu. Risk of Psychiatric Disorders Among Spouses of Patients With Cancer in Denmark and Sweden. *JAMA Netw Open*. Published January 05, 2023.

doi:10.1001/jamanetworkopen.2022.49560

### Data

**Data available:** No

### Additional Information

**Explanation for why data not available:** We are not able to make the data available due to Danish and Swedish laws. However, it is possible to apply the same data for research from Danish and Swedish registers.
